# Supplementary material for: Algorithm-supported, mass and sequence diversity-oriented random peptide library design
Source: PubMed Central journal article supplement (PMC6437963; doi:10.1186/s13321-019-0347-6), 2019-03-28
Supplement: 13321_2019_347_MOESM1_ESM.pdf [file 13321_2019_347_MOESM1_ESM.pdf]

## Supporting information

### Algorithm-supported, Mass and Sequence Diversity-oriented Random Peptide Library Design

Daniela Kalafatovic<sup>1\*</sup>, Goran Mauša<sup>2</sup>, Toni Todorovski<sup>1</sup>, Ernest Giralt<sup>1,2</sup>

<sup>1</sup> Institute for Research in Biomedicine (IRB Barcelona), The Barcelona Institute of Science and Technology (BIST), Baldori Reixac, 10, 08028 Barcelona, Spain

<sup>2</sup> Faculty of Engineering, University of Rijeka, Vukovarska 58, 51000, Rijeka, Croatia

<sup>3</sup> Department of Inorganic and Organic Chemistry, University of Barcelona, Marti i Franques, 1-5, 08028 Barcelona, Spain

\* Correspondence should be sent to [daniela.kalafatovic@gmail.com](mailto:daniela.kalafatovic@gmail.com)

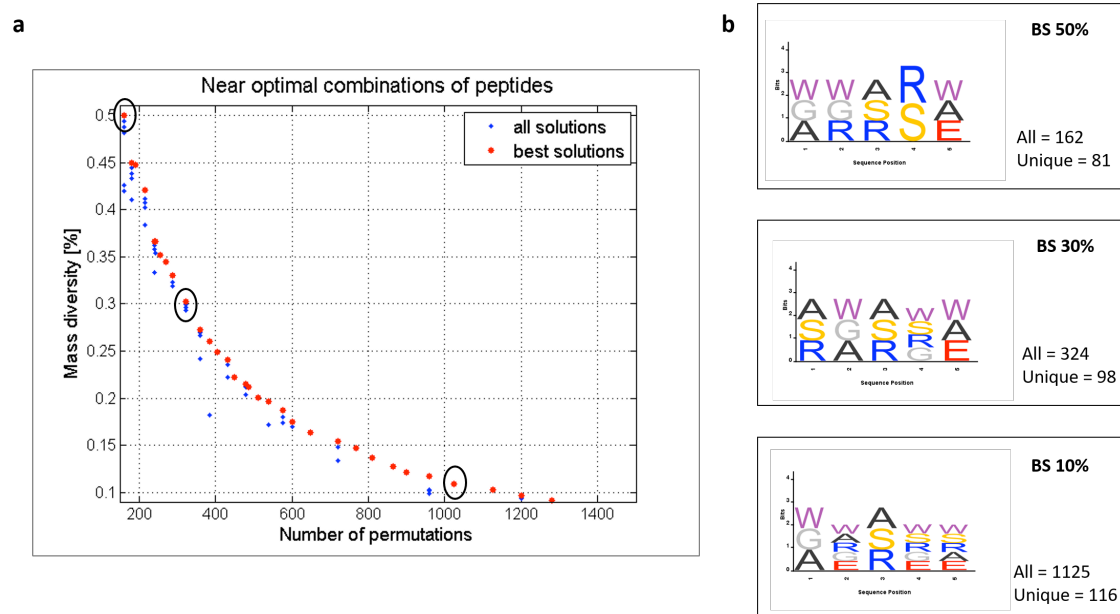

**Fig. S1 (a)** Pareto front zoom, range: <10% - 50%> of the optimization results for the OBOC peptide library having 5 positions where variability was introduced ( $r=5$ ), with  $m=6$  and  $x_i=\{s,e,r,w,a,G\}$ . We chose three best solutions: BS 50%, BS 30% and BS 10%. **(b)** Sequence logo representations of BS 50%, BS 30% and BS 10%.

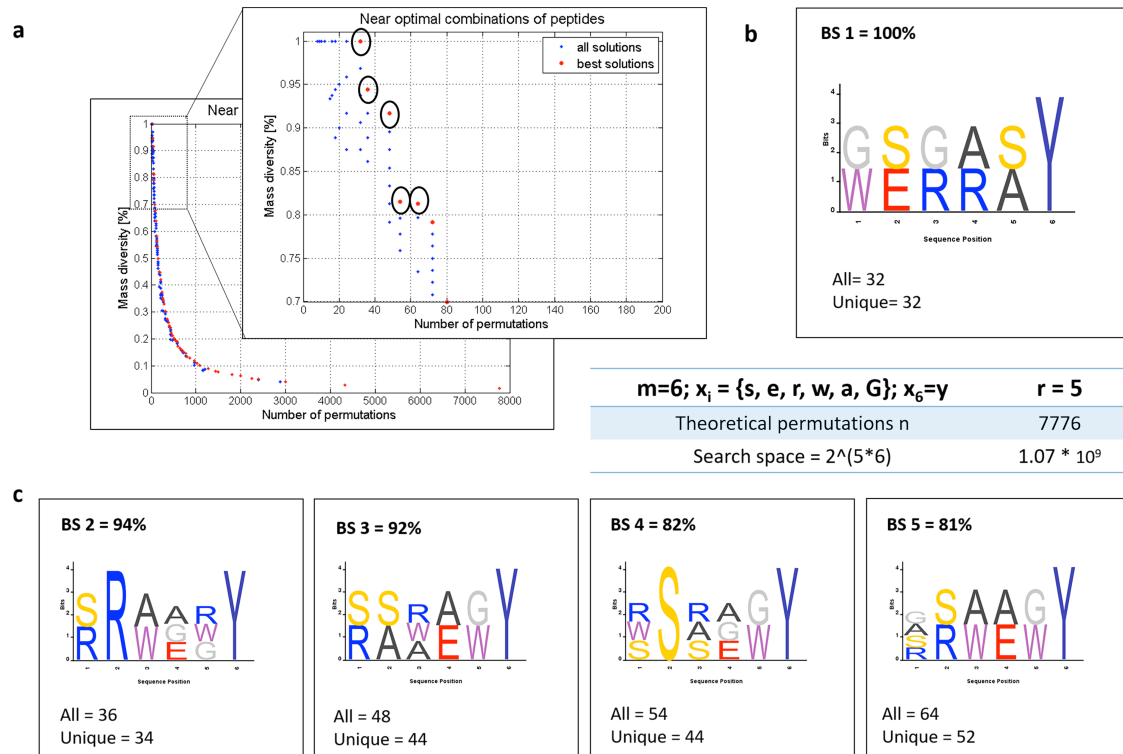

**Fig. S2 (a)** Pareto front (output) of the optimization results for the OBOC peptide library having 5 positions where variability was introduced ( $r=5$ ), with  $m=6$  and  $x_i=\{s,e,r,w,a,G\}$  and one fixed position, being  $x_6=y$ . In the zoom of the pareto front, in the range:  $<70\% - 100\%>$ , we chose five best solutions: BS 1 (100%), BS 2 (94%), BS 3 (92%), BS 4 (82%) and BS 5 (81%). **(b)** Sequence logo representation of the BS 1, showing the design we would propose for further examination. **(c)** Sequence logos of BS 2, BS 3, BS 4 and BS 5 suggesting various synthetic possibilities and pointing out possible synthetic challenges. Several other design suggestions are available, but we show only these five for simplicity.

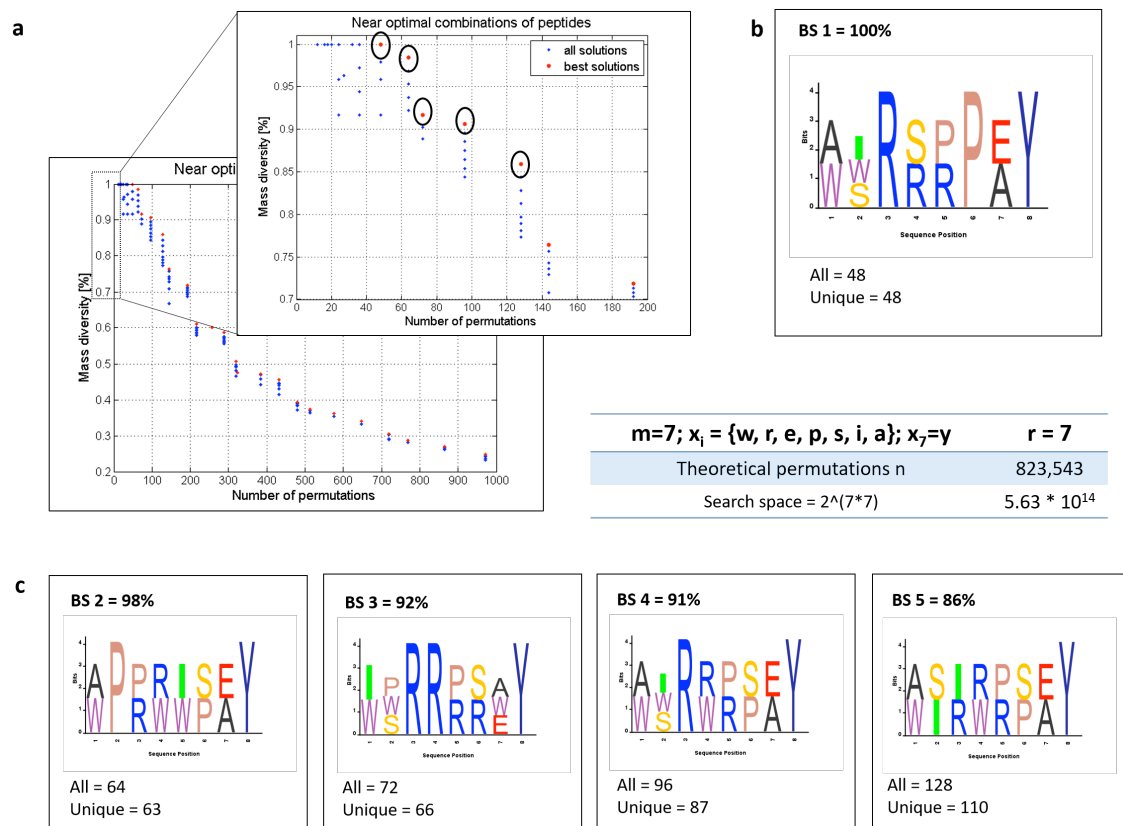

**Fig. S3 (a)** Pareto front (output) of the optimization results for the OBOC peptide library having 7 positions where variability was introduced ( $r=5$ ), with  $m=7$  and  $x_i=\{w,r,e,p,s,i,a\}$  and one fixed position, being  $x_8=y$ . In the zoom of the pareto front, in the range:  $<70\% - 100\%>$ , we chose five best solutions: BS 1 (100%), BS 2 (98%), BS 3 (92%), BS 4 (91%) and BS 5 (86%). **(b)** Sequence logo representation of the BS 1, with the total number of permutations if all the 7 amino acids were used in all the 7 positions alongside the search space accessed by the algorithm. **(c)** Sequence logos of BS 2, BS 3, BS 4 and BS 5 suggesting various synthetic possibilities and pointing out possible synthetic challenges. As for previous examples, several other design suggestions are available.

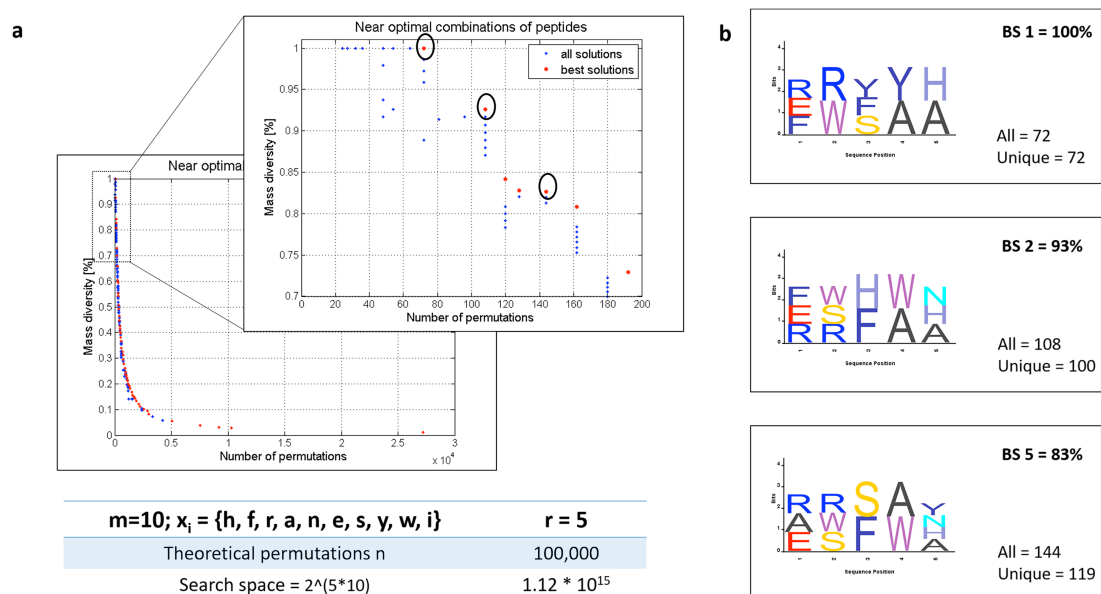

**Fig. S4 (a)** Pareto front (output) of the optimization results for the OBOC peptide library having 5 positions where variability was introduced ( $r=5$ ), with  $m=10$  and  $x_i=\{h,f,r,a,n,e,s,y,w,i\}$ . In the zoom of the pareto front in the range: <70% - 100%>, we chose three best solutions: BS 1 (100%), BS 2 (93%) and BS 5 (83%) suggesting various synthetic possibilities and pointing out possible synthetic challenges. In addition, the total number of permutations if all the 10 amino acids were used in all the 5 positions alongside the search space accessed by the algorithm are shown.

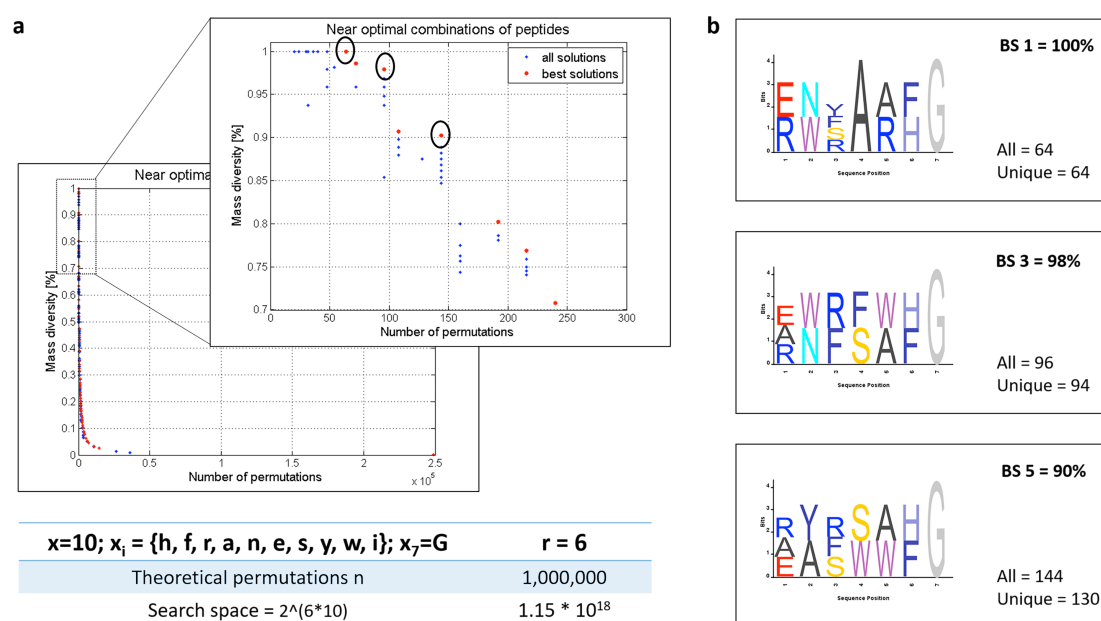

**Fig. S5 (a)** Pareto front (output) of the optimization results for the OBOC peptide library having 6 positions where variability was introduced ( $r=6$ ), with  $m=10$  and  $x_i=\{h,f,r,a,n,e,s,y,w,i\}$  and one fixed position  $x_7=G$ . In the zoom of the pareto front in the range: <70% - 100%>, we chose three best solutions: BS 1 (100%), BS 3 (98%) and BS 5 (90%) suggesting various synthetic possibilities and pointing out possible synthetic challenges. In addition, the total number of permutations if all the 10 amino acids were used in 6 positions alongside the search space accessed by the algorithm are shown.

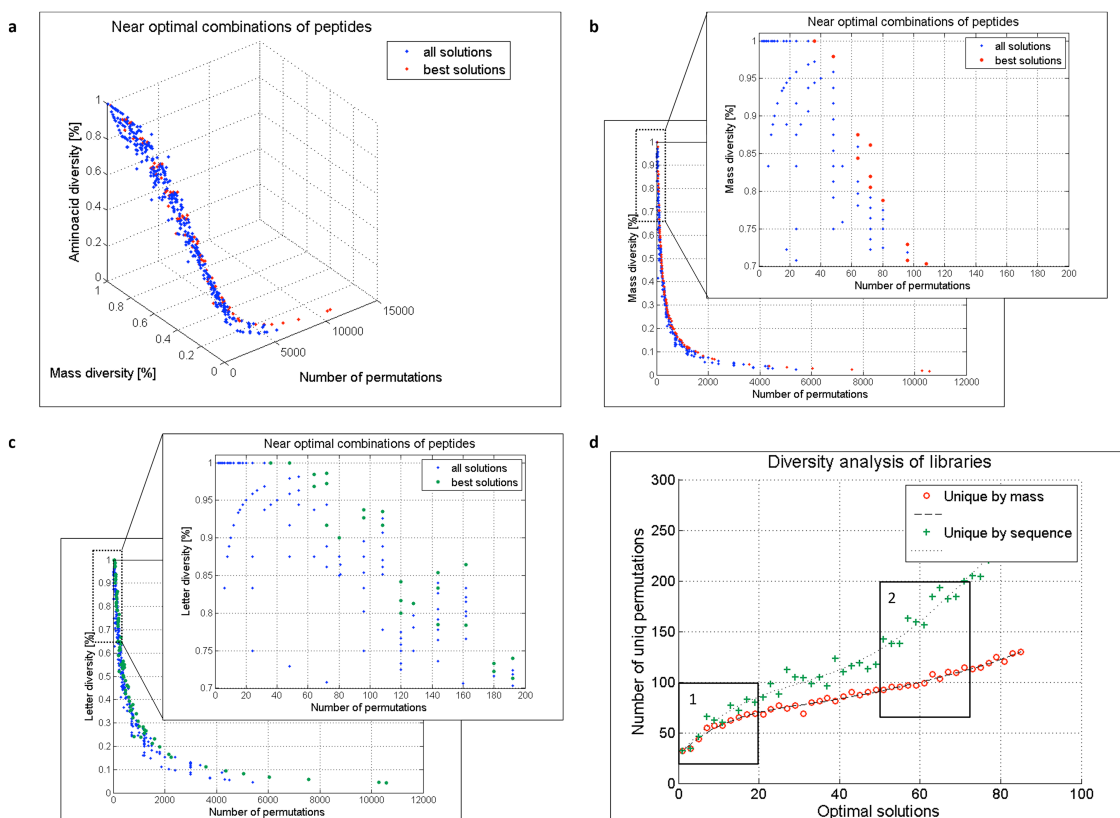

**Fig. S6** (a) 3D Pareto front of the best, i.e. near optimal solutions (red dots) and all the remaining solutions (blue dots) from the final generation, calculated with the 3-objective optimization for the following input: the number of positions, with 5 variable positions ( $r=5$ ) with  $m=7$  and  $x_i=\{s,e,r,w,a,G,i\}$ , 2 fixed positions ( $x_3=\{p\}$ ,  $x_7=\{y\}$ ) and tolerance ( $\Delta\text{mass}=1$ ) to discriminate between permutations. (b) 2D Pareto front representing mass diversity (y-axis) relative to the total number of permutations (x-axis) with zoomed presentation in the range  $70\% \leq \text{mass diversity} \leq 100\%$ . (c) 2D Pareto front representing sequence diversity (y-axis) relative to the total number of permutations (x-axis) with zoomed presentation in the range  $70\% \leq \text{sequence diversity} \leq 100\%$ . (d) Diversity analysis of all best solutions for library design (x-axis) in terms of the number of unique permutations (y-axis), where each solution is represented with the number of permutations unique by sequence (green points) and by mass (red points). Two areas of interest are labeled with: (1) Overlapping zone where the diversity by sequence and by mass is very similar, (2) Diversity zone where the diversity by sequence is greater than the diversity by mass.

### Unique by sequence

| Entry | Permutations | Monoiso_mass | [M+H]    |
|-------|--------------|--------------|----------|
| 1     | aGpGssy      | 637.2708     | 638.2786 |
| 2     | aGpGisy      | 663.3228     | 664.3306 |
| 3     | aGpGesy      | 679.2813     | 680.2892 |
| 4     | aGpGsry      | 706.34       | 707.3478 |
| 5     | aGpessy      | 709.2919     | 710.2997 |
| 6     | rGpGssy      | 722.3348     | 723.3427 |
| 7     | aGpGiry      | 732.392      | 733.3998 |
| 8     | aGpeisy      | 735.3439     | 736.3517 |
| 9     | aGpGery      | 748.3505     | 749.3583 |
| 10    | rGpGisy      | 748.3869     | 749.3947 |
| 11    | aGpeesy      | 751.3024     | 752.3103 |
| 12    | wGpGssy      | 752.313      | 753.3208 |
| 13    | rGpGesy      | 764.3454     | 765.3532 |
| 14    | awpGssy      | 766.3286     | 767.3365 |

### Unique by mass

| Entry | Permutations | Monoiso_mass | [M+H]    |
|-------|--------------|--------------|----------|
| 1     | aGpGssy      | 637.2708     | 638.2786 |
| 2     | aGpGisy      | 663.3228     | 664.3306 |
| 3     | aGpGesy      | 679.2813     | 680.2892 |
| 4     | aGpGsry      | 706.34       | 707.3478 |
| 5     | aGpessy      | 709.2919     | 710.2997 |
| 6     | rGpGssy      | 722.3348     | 723.3427 |
| 7     | aGpGiry      | 732.392      | 733.3998 |
| 8     | aGpeisy      | 735.3439     | 736.3517 |
| 9     | aGpGery      | 748.3505     | 749.3583 |
| 10    | aGpeesy      | 751.3024     | 752.3103 |
| 11    | wGpGssy      | 752.313      | 753.3208 |
| 12    | rGpGesy      | 764.3454     | 765.3532 |
| 13    | awpGssy      | 766.3286     | 767.3365 |
| 14    | aGpesry      | 778.361      | 779.3689 |

**Fig. S7** Screenshot of a part of the list of permutations unique by sequence (left) and unique by mass (right) highlighting the mass overlapping of two permutations that differ by amino acid composition but were excluded in the unique by mass 2-objective optimization. In this particular case the monoisotopic mass of ‘ae’ dipeptide (218.116) overlaps with the one of the ‘is’ dipeptide (218.079).

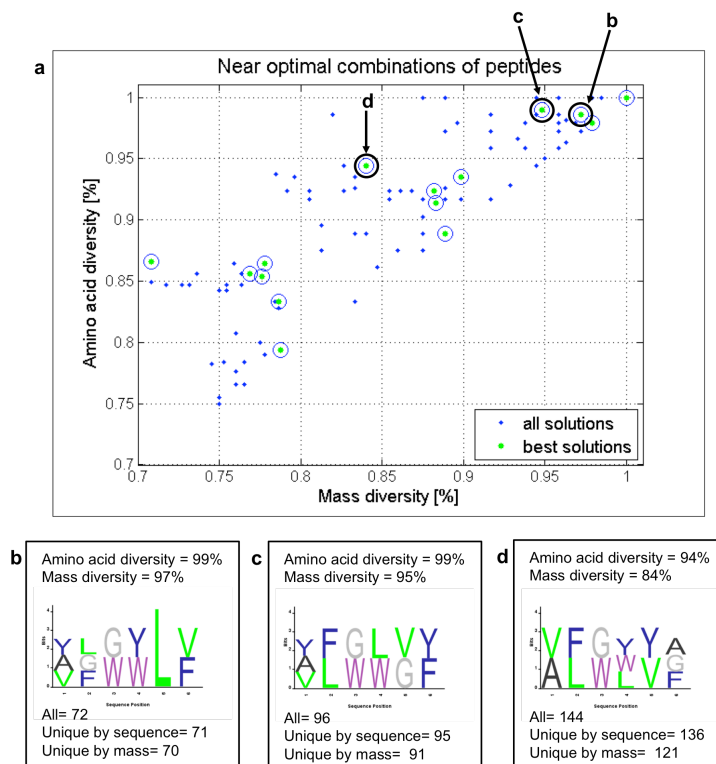

**Fig. S8 (a)** 2D Pareto front of the best, *i.e.* near optimal solutions (green dots) and all the remaining solutions (blue dots) from the final generation representing mass diversity (x-axis) and sequence diversity (y-axis) relative to the total number of permutations. **(b)**, **(c)** and **(d)** Sequence logos of library designs encircled in subfigure (a) for  $r=6$ ,  $m=7$  for  $x_i=\{f,w,y,l,a,v,G\}$  and  $T(\Delta mass)=0.1$  input.

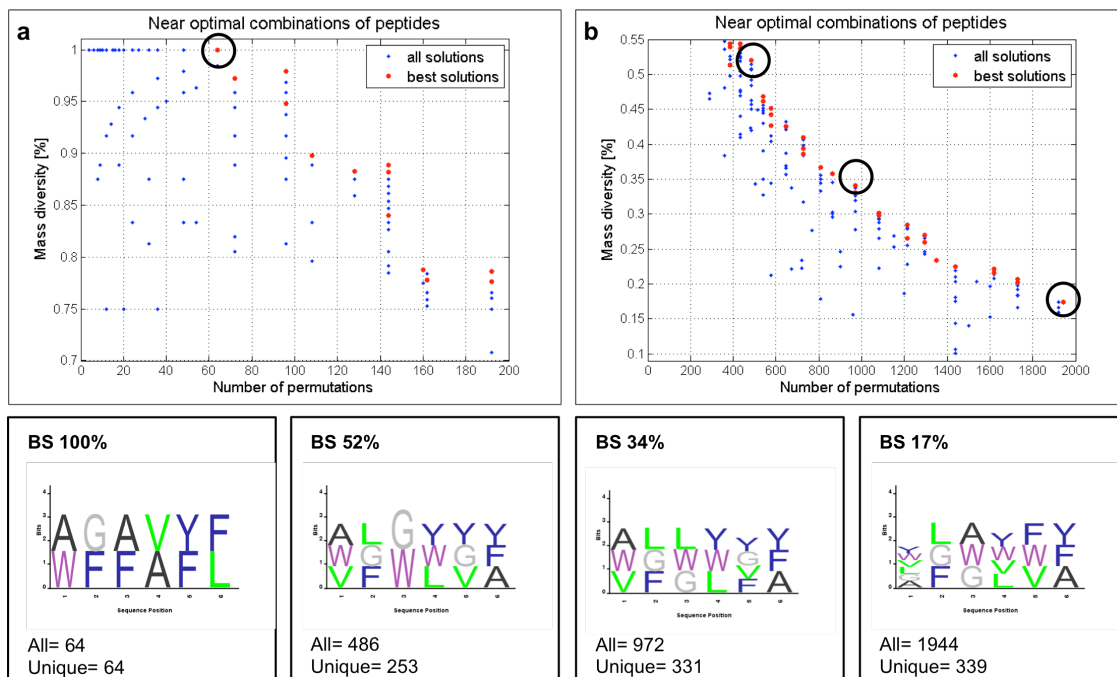

**Fig. S9** Pareto front zoom, range: **(a)** <70% - 100%> and **(b)** <10% - 50%> of the optimization results for the OBOC peptide library having 6 positions where variability was introduced ( $r=6$ ), with  $m=7$  for  $x_i=\{f,w,y,l,a,v,G\}$  and  $T(\Delta mass)=0.1$ . Sequence logo representations of four best solutions are presented below: BS 100%, BS 52%, BS 34% and BS 17%.

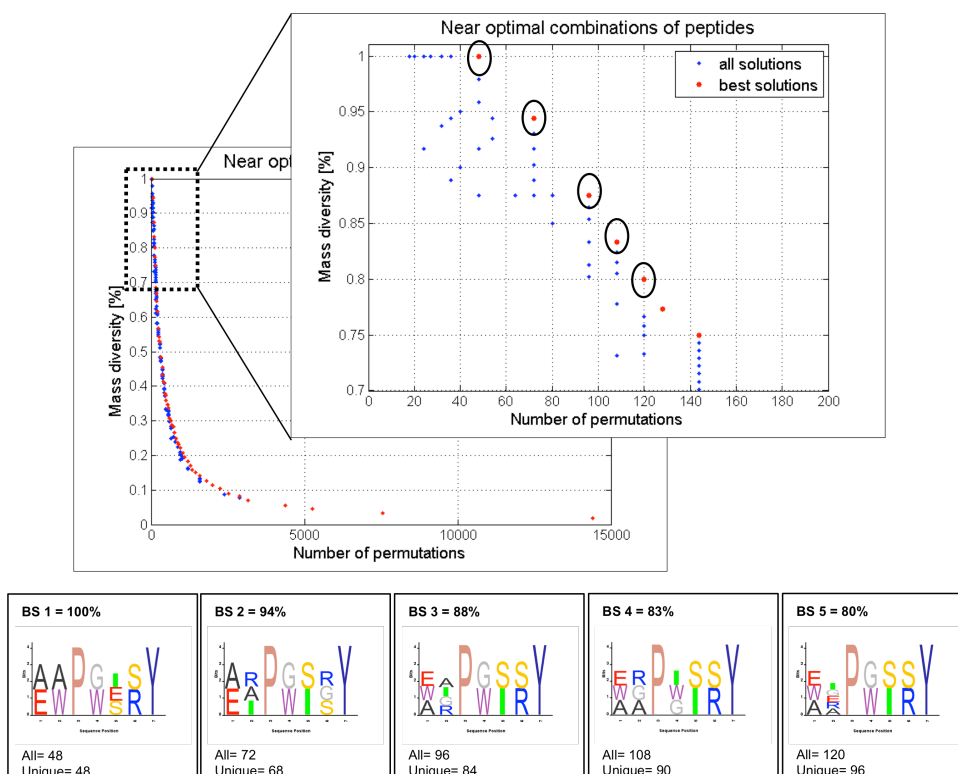

**Fig. S10** Tolerance=0.5. Pareto front of the optimization results for the OBOC peptide library from figure 2 ( $r=5$ ,  $m=7$  for  $x_i=\{s,e,r,w,a,G,i\}$  and  $x_3=p$ ,  $x_7=y$ ) with  $T(\Delta mass)$  set to 0.5. In the zoom of the Pareto front, in the range: <70% - 100%>, we chose five best solutions: BS 1 (100%), BS 2 (94%), BS 3 (88%), BS 4 (83%) and BS 5 (80%) and presented their sequence logos. As for previous examples, several other design suggestions are available.

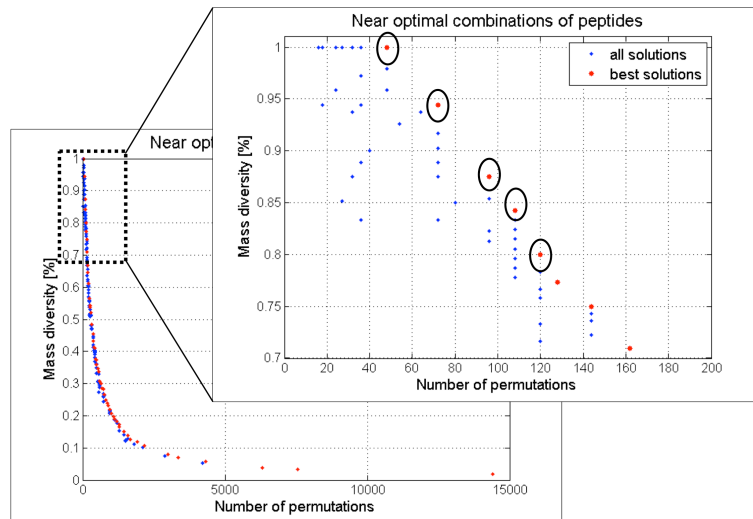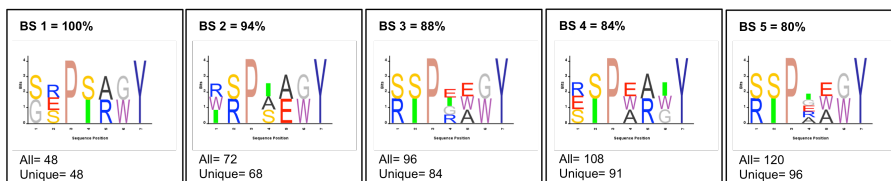

**Fig. S11 Tolerance=0.1.** Pareto front of the optimization results for the OBOC peptide library from figure 2 ( $r=5$ ,  $m=7$  for  $x_i=\{s,e,r,w,a,g,i\}$  and  $x_3=p$ ,  $x_7=y$ ) with  $T(\Delta mass)$  set to 0.1. In the zoom of the pareto front, in the range: <70% - 100%>, we chose five best solutions: BS 1 (100%), BS 2 (94%), BS 3 (88%), BS 4 (84%) and BS 5 (80%) and presented their sequence logos. As for previous examples, several other design suggestions are available.

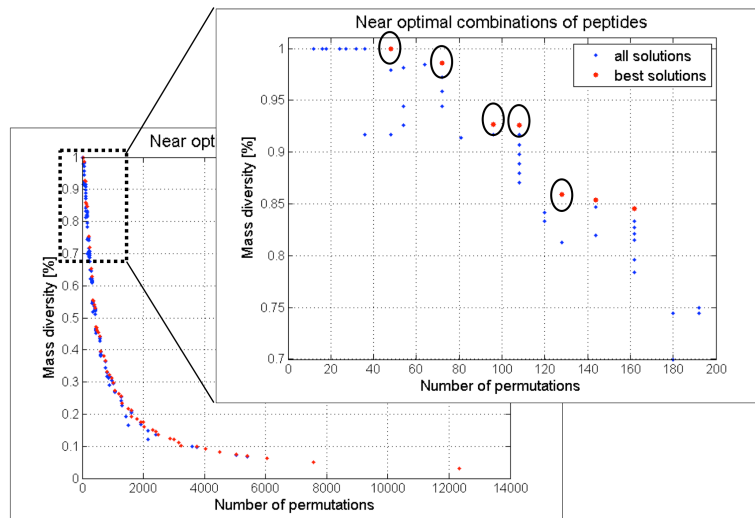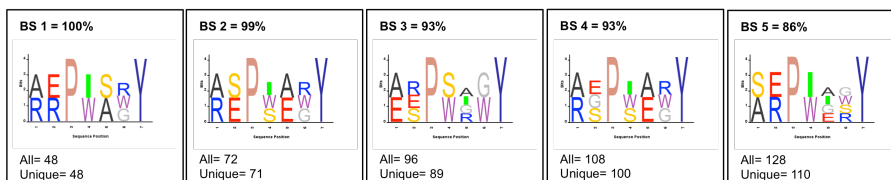

**Fig. S12 Tolerance=0.01.** Pareto front of the optimization results for the OBOC peptide library from figure 2 ( $r=5$ ,  $m=7$  for  $x_i=\{s,e,r,w,a,g,i\}$  and  $x_3=p$ ,  $x_7=y$ ) with  $T(\Delta mass)$  set to 0.01. In the zoom of the pareto front, in the range: <70% - 100%>, we chose five best solutions: BS 1 (100%), BS 2 (99%), BS 3 (93%), BS 4 (93%) and BS 5 (86%) and presented their sequence logos. As for previous examples, several other design suggestions are available.



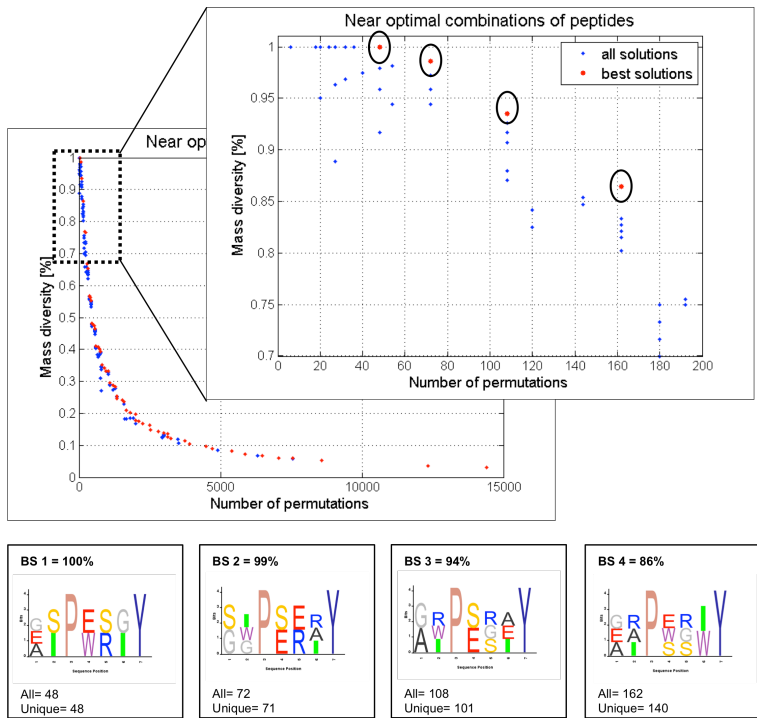

**Fig. S13 Tolerance=0.001.** Pareto front of the optimization results for the OBOC peptide library from figure 2 ( $r=5$ ,  $m=7$  for  $x_i=\{s,e,r,w,a,G,i\}$  and  $x_3=p$ ,  $x_7=y$ ) with  $T(\Delta mass)$  set to 0.001. In the zoom of the pareto front, in the range: <70% - 100%>, we chose four best solutions: BS 1 (100%), BS 2 (99%), BS 3 (94%), and BS 4 (86%) and presented their sequence logos. As for previous examples, several other design suggestions are available.

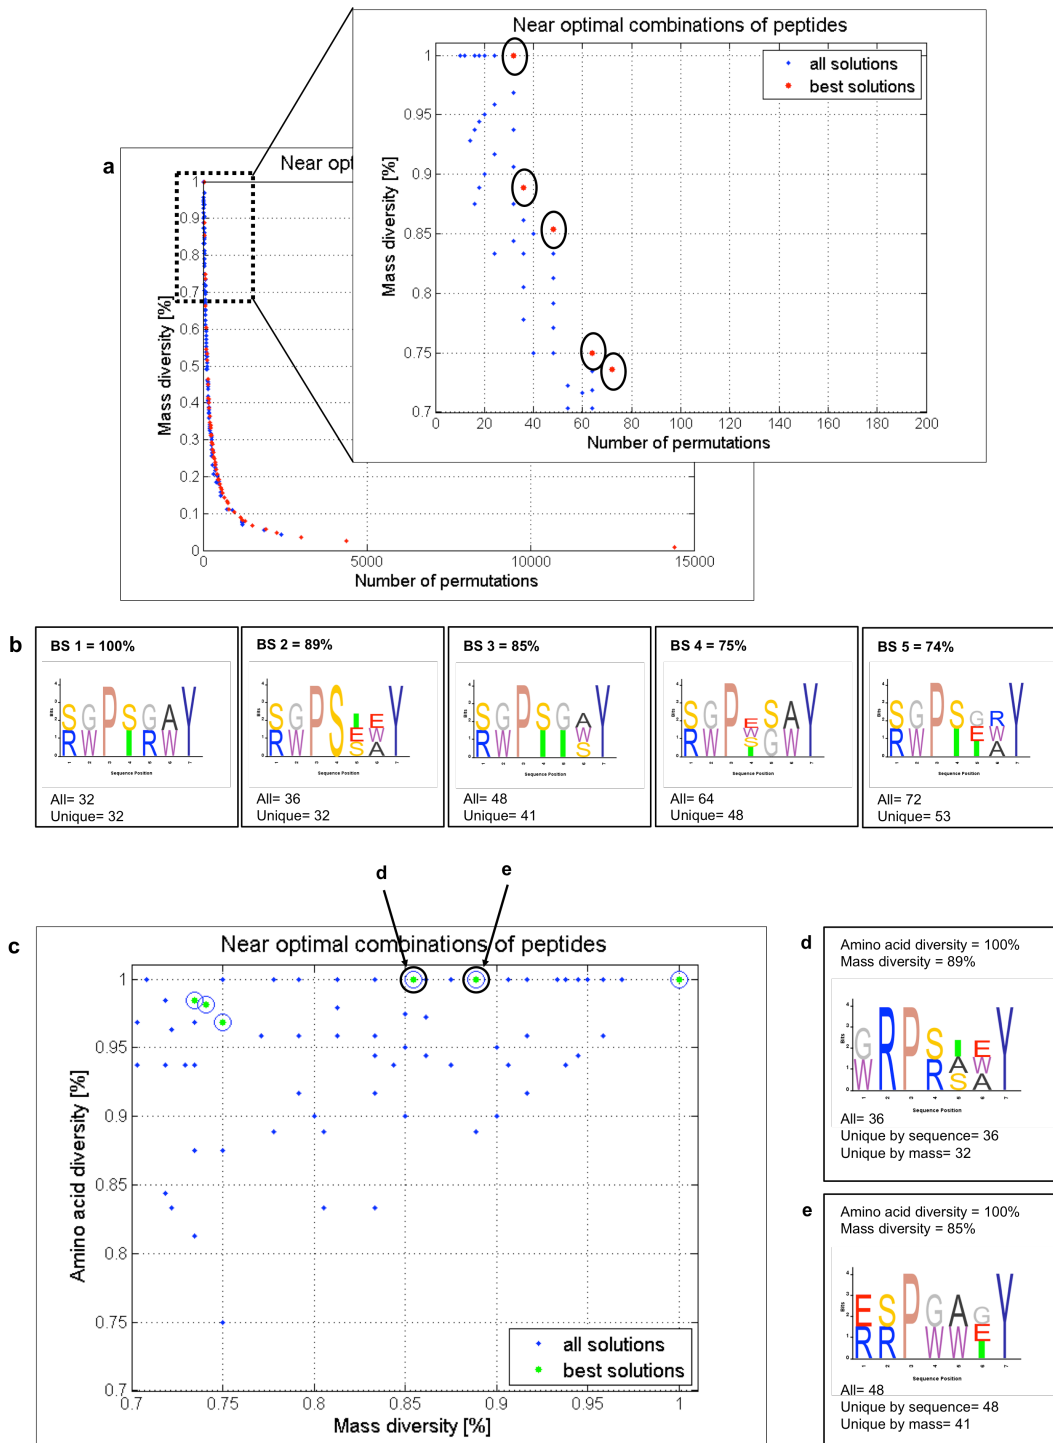

**Fig. S14 Tolerance=2.5.** (a) Pareto front of the optimization results (2-objective) for the OBOC peptide library from figure 2 ( $r=5$ ,  $m=7$  for  $x_i=\{s,e,r,w,a,g,i\}$  and  $x_3=p$ ,  $x_7=y$ ) with  $T(\Delta mass)$  set to 2.5. In the zoom of the pareto front, in the range: <70% - 100%>, we chose five best solutions: BS 1 (100%), BS 2 (94%), BS 3 (88%), BS 4 (84%) and BS 5 (80%) and presented their sequence logos (b). (c) 2D Pareto front of the best, i.e. near optimal solutions (green dots) and all the remaining solutions (blue dots) from the final generation representing mass diversity (x-axis) and sequence diversity (y-axis) relative to the total number of permutations (3-objective setting). (d) and (e) sequence logos of library designs encircled in subfigure (c) for the same input.
