# Supplementary material for: Algorithm-supported, mass and sequence diversity-oriented random peptide library design
Source: PubMed Central journal article supplement (PMC6437963; doi:10.1186/s13321-019-0347-6), 2019-03-28
Supplement: 13321_2019_347_MOESM2_ESM.pdf [file 13321_2019_347_MOESM2_ESM.pdf]

Table S1. List of all the amino acid permutations for BS 2, from the optimization in fig 4.

| Entry | Permutations   | Average mass    | Monoisotopic mass | Expected [M+H]  | Expected [M+2H]/2 |
|-------|----------------|-----------------|-------------------|-----------------|-------------------|
| 1     | aspasGy        | 651.6686        | 651.2864          | 652.2943        | 326.6510          |
| 2     | aspaiGy        | 677.7492        | 677.3385          | 678.3463        | 339.6771          |
| 3     | aspaeGy        | 693.7055        | 693.2970          | 694.3048        | 347.6563          |
| 4     | aspesGy        | 709.7050        | 709.2919          | 710.2997        | 355.6538          |
| 5     | arpasGy        | 720.7773        | 720.3556          | 721.3634        | 361.1856          |
| 6     | aspeiGy        | 735.7856        | 735.3439          | 736.3517        | 368.6798          |
| 7     | arpaiGy        | 746.8579        | 746.4077          | 747.4155        | 374.2117          |
| 8     | aspeeGy        | 751.7419        | 751.3024          | 752.3102        | 376.6590          |
| 9     | arpaeGy        | 762.8142        | 762.3662          | 763.3740        | 382.1909          |
| 10    | wspasGy        | 766.8013        | 766.3286          | 767.3365        | 384.1721          |
| 11    | arpesGy        | 778.8137        | 778.3610          | 779.3689        | 390.1884          |
| 12    | aspaswy        | 780.8279        | 780.3443          | 781.3521        | 391.1800          |
| 13    | wspaiGy        | 792.8819        | 792.3807          | 793.3885        | 397.1982          |
| 14    | arpeiGy        | 804.8943        | 804.4131          | 805.4209        | 403.2144          |
| 15    | aspaiwy        | 806.9085        | 806.3963          | 807.4042        | 404.2060          |
| 16    | wspaeGy        | 808.8382        | 808.3392          | 809.3470        | 405.1774          |
| 17    | arpeeGy        | 820.8506        | 820.3716          | 821.3794        | 411.1936          |
| 18    | aspaewy        | 822.8648        | 822.3548          | 823.3627        | 412.1853          |
| 19    | wspesGy        | 824.8377        | 824.3341          | 825.3419        | 413.1749          |
| 20    | wrpasGy        | 835.9100        | 835.3978          | 836.4057        | 418.7067          |
| 21    | aspeswy        | 838.8643        | 838.3497          | 839.3576        | 420.1827          |
| 22    | <b>arpaswy</b> | <b>849.9366</b> | <b>849.4135</b>   | <b>850.4213</b> | <b>425.7146</b>   |
| 23    | <b>wspeiGy</b> | <b>850.9183</b> | <b>850.3862</b>   | <b>851.3940</b> | <b>426.2009</b>   |
| 24    | wrpaiGy        | 861.9906        | 861.4499          | 862.4577        | 431.7328          |
| 25    | aspeiwy        | 864.9449        | 864.4018          | 865.4096        | 433.2087          |
| 26    | wspreeGy       | 866.8746        | 866.3447          | 867.3525        | 434.1802          |
| 27    | arpaiwy        | 876.0172        | 875.4655          | 876.4734        | 438.7406          |
| 28    | wrpaeGy        | 877.9469        | 877.4084          | 878.4162        | 439.7120          |
| 29    | aspeewy        | 880.9012        | 880.3603          | 881.3681        | 441.1880          |
| 30    | arpaewy        | 891.9735        | 891.4240          | 892.4319        | 446.7198          |
| 31    | wrpesGy        | 893.9464        | 893.4033          | 894.4111        | 447.7095          |
| 32    | wspaswy        | 895.9606        | 895.3865          | 896.3943        | 448.7011          |
| 33    | arpeswy        | 907.9730        | 907.4189          | 908.4267        | 454.7173          |
| 34    | wrpeiGy        | 920.0270        | 919.4553          | 920.4631        | 460.7355          |
| 35    | wspaiwy        | 922.0412        | 921.4386          | 922.4464        | 461.7271          |
| 36    | arpeiwy        | 934.0536        | 933.4710          | 934.4788        | 467.7433          |
| 37    | wrpeeGy        | 935.9833        | 935.4138          | 936.4216        | 468.7147          |
| 38    | wspaewy        | 937.9975        | 937.3971          | 938.4049        | 469.7064          |
| 39    | arpeewy        | 950.0099        | 949.4295          | 950.4373        | 475.7226          |

|    |         |           |           |           |          |
|----|---------|-----------|-----------|-----------|----------|
| 40 | wspeswy | 953.9970  | 953.3920  | 954.3998  | 477.7038 |
| 41 | wrpaawy | 965.0693  | 964.4557  | 965.4635  | 483.2357 |
| 42 | wspeiwy | 980.0776  | 979.4440  | 980.4519  | 490.7298 |
| 43 | wrpaiwy | 991.1499  | 990.5077  | 991.5156  | 496.2617 |
| 44 | wspeewy | 996.0339  | 995.4025  | 996.4103  | 498.7091 |
| 45 | wrpaewy | 1007.1062 | 1006.4662 | 1007.4741 | 504.2410 |
| 46 | wrpeswy | 1023.1057 | 1022.4611 | 1023.4690 | 512.2384 |
| 47 | wrpeiwy | 1049.1863 | 1048.5132 | 1049.5210 | 525.2644 |
| 48 | wrpeewy | 1065.1426 | 1064.4717 | 1065.4795 | 533.2437 |
